# Supplementary material for: A Unique Combination of Nutritionally Active Ingredients Can Prevent Several Key Processes Associated with Atherosclerosis In Vitro
Source: PLoS One. 2016 Mar 7;11(3):e0151057. doi: 10.1371/journal.pone.0151057 (PMC4780775; doi:10.1371/journal.pone.0151057)
Supplement: S1 Data — (XLSX) [file pone.0151057.s002.xlsx]

## Sheet: Fig 1
Fig 1a
	Treatment	Mean	standard error (SEM)	p value compared to control
	Vehicle Control	100	1.39	No significant difference (NS)
	0.25x	96.8739	1.67	NS
	0.5x	95.5515	1.51	NS
	1x	96.5698	2.23	NS
	2x	96.9517	1.47	NS
	4x	101.378	1.34	NS
Fig 1b
	Treatment	Mean	standard error (SEM)	p value compared to control
	Vehicle Control	100	3.51	NS
	0.25x	102.633	3.13	NS
	0.5x	101.656	4.31	NS
	1x	106.704	4.86	NS
	2x	114.936	5.66	NS
	4x	121.509	7.63	NS

## Sheet: Fig 2
Fig 2a
	Treatment	Mean	standard error (SEM)	p value compared to IFN-y
	Vehicle Control	1	0.0583	<0.001
	IFN-y	7.83388	0.7717
	1x (+PS)	2.25015	0.6242	0.004
	2x (+PS)	2.06896	0.5282	0.001
Fig 2b
	Treatment	Mean	standard error (SEM)	p value compared to IFN-y
	Vehicle Control	1	0.062652	0.014
	IFN-y	2.55322	0.439197
	1x (+PS)	1.24751	0.199555	0.108
	2x (+PS)	1.08432	0.230174	0.01
Fig 2c
	Treatment	Mean	standard error (SEM)	p value compared to IFN-y
	Vehicle Control	1	0.058189	<0.001
	IFN-y	10.1312	2.25213
	1x (+PS)	2.11495	0.587086	0.001
	2x (+PS)	2.20691	0.691995	0.002
Fig 2d
	Treatment	Mean	standard error (SEM)	p value compared to IFN-y
	Vehicle Control	1	0.118893	0.001
	IFN-y	1.99265	0.113371
	1x (+PS)	0.941454	0.110673	<0.001
	2x (+PS)	1.08432	0.070415	<0.001
Fig 2e
	Treatment	Mean	standard error (SEM)	p value compared to IFN-y
	Vehicle Control	1	0.0783886	0.016
	IFN-y	1.74589	0.235287
	1x (+PS)	0.647855	0.310867	0.002
	1x (-PS)	0.862749	0.31128	0.013

## Sheet: Fig 3 
Fig 3
	Treatment	Mean	standard error (SEM)	p value compared to MCP-1
	Vehicle Control	0.146065	0.0922917	<0.001
	MCP-1	1	0.191743
	1x (+PS)	0.618056	0.219182	0.001
	1x (-PS)	0.630324	0.331928	0.023

## Sheet: Fig 4
Fig 4
	Treatment	Mean	standard error (SEM)	p value compared to ApoA-I
	ApoA-I	1	0.0188452
	1x (+PS)	1.61056	0.11542	0.002
	1x (-PS)	1.53063	0.0912034	0.001

## Sheet: Fig 5
Fig 5a
	Treatment	Mean	standard error (SEM)	p value compared to IFNy+LPS
	Vehicle Control	0.000644	9.9333e-05	<0.001
	IFNy+LPS	1	0.0334176
	1x (+PS)	0.52374	0.0781068	0.004
	1x (-PS)	0.554119	0.0727468	0.002
Fig 5b
	Treatment	Mean	standard error (SEM)	p value compared to IFNy+LPS
	Vehicle Control	0.065142	0.010721	<0.001
	IFNy+LPS	1	0.098564
	1x (+PS)	0.585484	0.070976	0.015
	1x (-PS)	0.628173	0.097259	NS (0.056)

## Sheet: Fig 6
Fig 6
	Treatment	Mean	standard error (SEM)	p value compared to MCP-1
	Vehicle Control	0.104052	0.0370597	<0.001
	MCP-1	1	0.146928
	EPA	0.473074	0.110415	0.009
	DHA	0.689488	0.0940593	NS
	Catechin	0.524804	0.0793387	0.02
	Stigmasterol	0.779998	0.120232	NS
	Campesterol	0.658479	0.143969	NS
	Beta-Sitosterol	0.625714	0.111053	NS

## Sheet: S1 Fig
Fig 1a
	Treatment	Mean	standard error (SEM)	p value compared to IFN-y
	Vehicle Control	1	0.14725	0.008
	IFN-y	32.3856	12.5289	NS
	0.25x	5.92726	1.99482	NS
	0.5x	2.51338	0.39937	Ns
	1x	1.08634	0.16723	0.014
	2x	8.87734	2.94731	NS
	4x	1.53955	0.31422	0.029
Fig 1b
	Treatment	Mean	standard error (SEM)	p value compared to IFN-y
	Vehicle Control	1	0.09841	<0.001
	IFN-y	9.03831	2.06501	NS
	0.25x	5.43466	1.03362	NS
	0.5x	6.56447	1.03678	NS
	1x	7.20681	0.94487	NS
	2x	2.69817	0.23506	0.012
	4x	2.21777	0.28255	0.002
